# Supplementary material for: The Relationship between Health Literacy and COVID-19 Vaccination Prevalence during a Rapidly Evolving Pandemic and Infodemic
Source: MDPI journal article supplement (doi:10.3390/vaccines10121989), 2022-11-23
Supplement: s1 [file s1]

Table S1: Health Literacy Scales

| Scale Name                                                         | Individual | Organizational | Functional | Interactive | Critical |
|--------------------------------------------------------------------|------------|----------------|------------|-------------|----------|
| Feeling understood and supported by healthcare providers (HPS)     |            | X              |            | X           |          |
| Having sufficient information to manage my health (HSI)            | X          |                | X          |             |          |
| Actively managing my health (AMH)                                  | X          |                |            | X           | X        |
| Social support for health (SS)                                     | X          |                |            | X           | X        |
| Appraisal of health information (CA)                               | X          |                |            |             | X        |
| Ability to actively engage with healthcare providers (AE)          | X          |                |            | X           |          |
| Navigating the healthcare system (NHS)                             |            | X              |            | X           |          |
| Ability to find good health information (FHI)                      | X          |                | X          | X           |          |
| Understand health information well enough to know what to do (UHI) | X          |                | X          |             |          |

Table S2: Comparisons of Functional, Interactive, and Critical Health Literacy among County Areas

|                             | Kruskal-Wallis H Test Statistic |             |          |
|-----------------------------|---------------------------------|-------------|----------|
|                             | Functional                      | Interactive | Critical |
| South Fulton – North Fulton | 7.26*                           | 8.91*       | 10.06*   |
| South Fulton – Atlanta      | 10.49*                          | 12.47*      | 13.34*   |
| North Fulton – Atlanta      | 1.66                            | 1.67        | 1.21     |

\*Significant at  $\alpha < .05$
